# Supplementary material
Source: PubMed Central journal article supplement (PMC4540606)
Supplement: NIHMS675087-supplement-1.pdf [file NIHMS675087-supplement-1.pdf]

**Fig. S1**

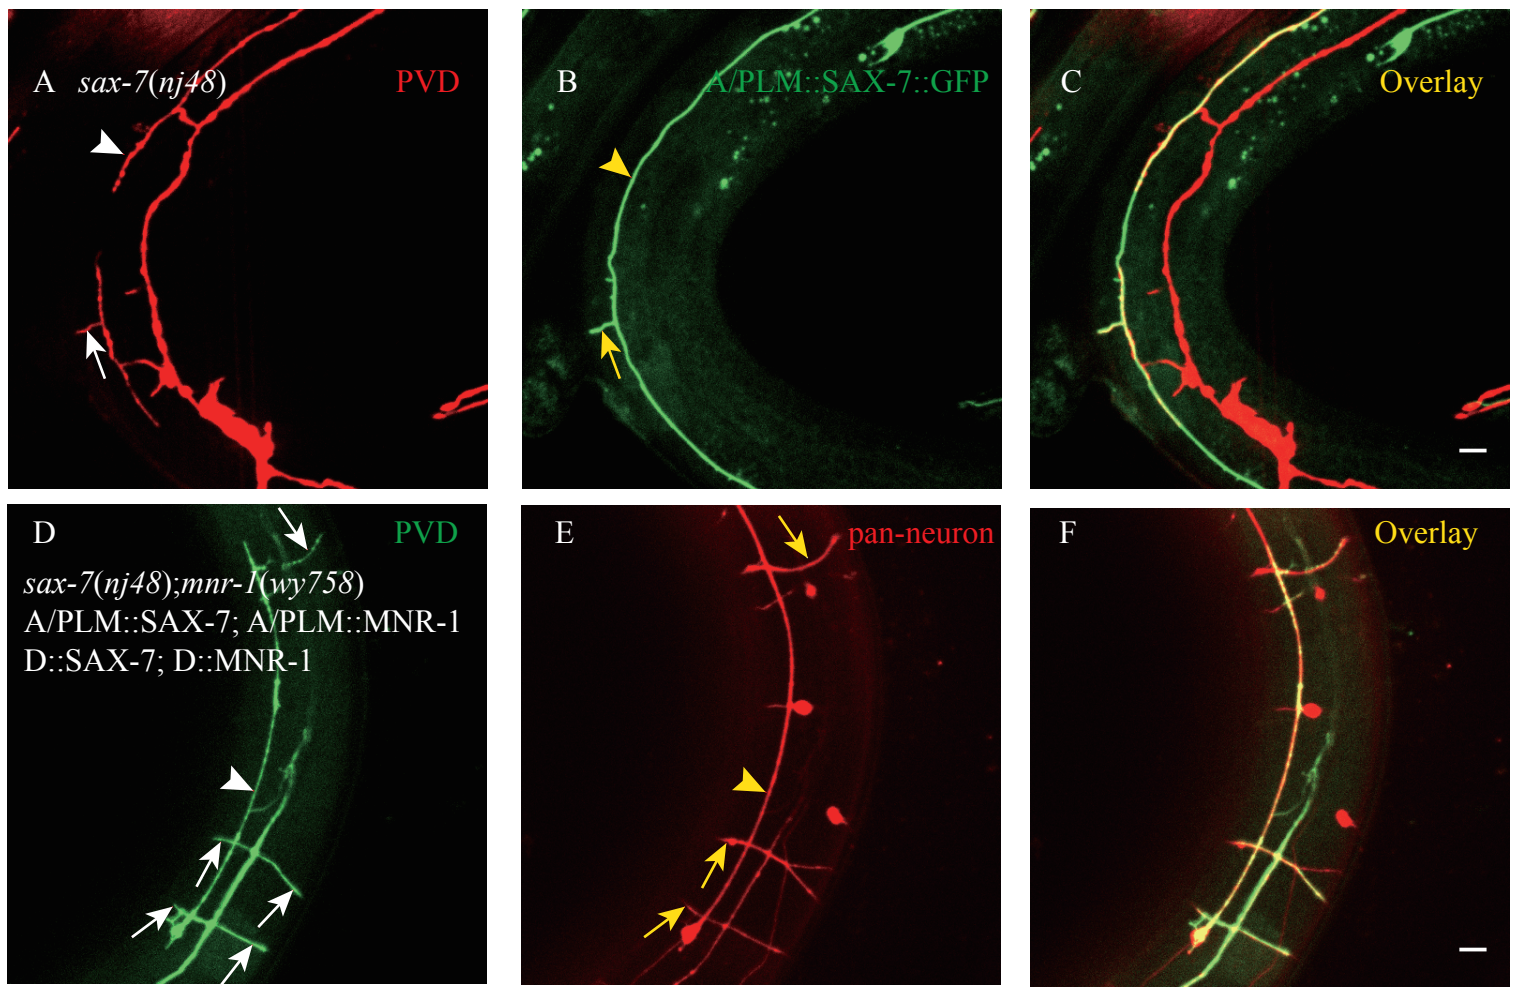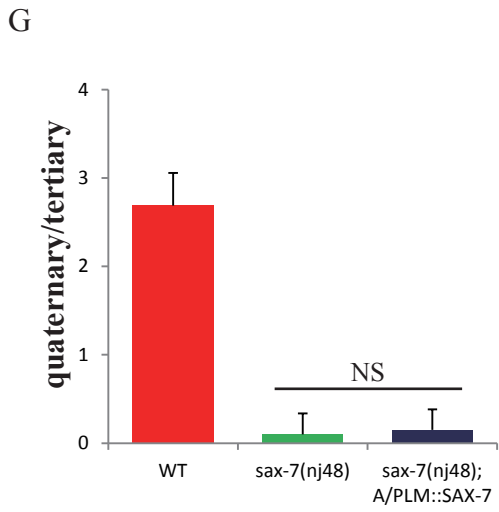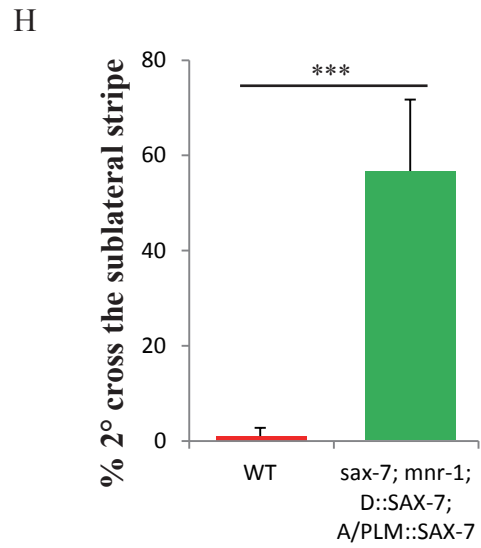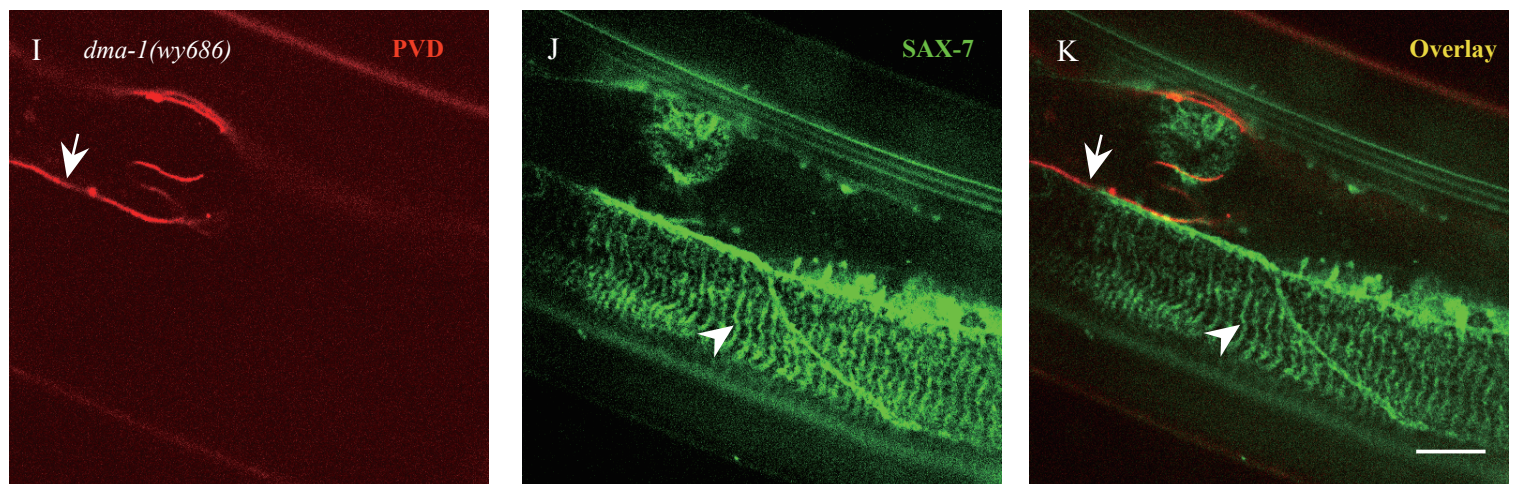



Fig. S2

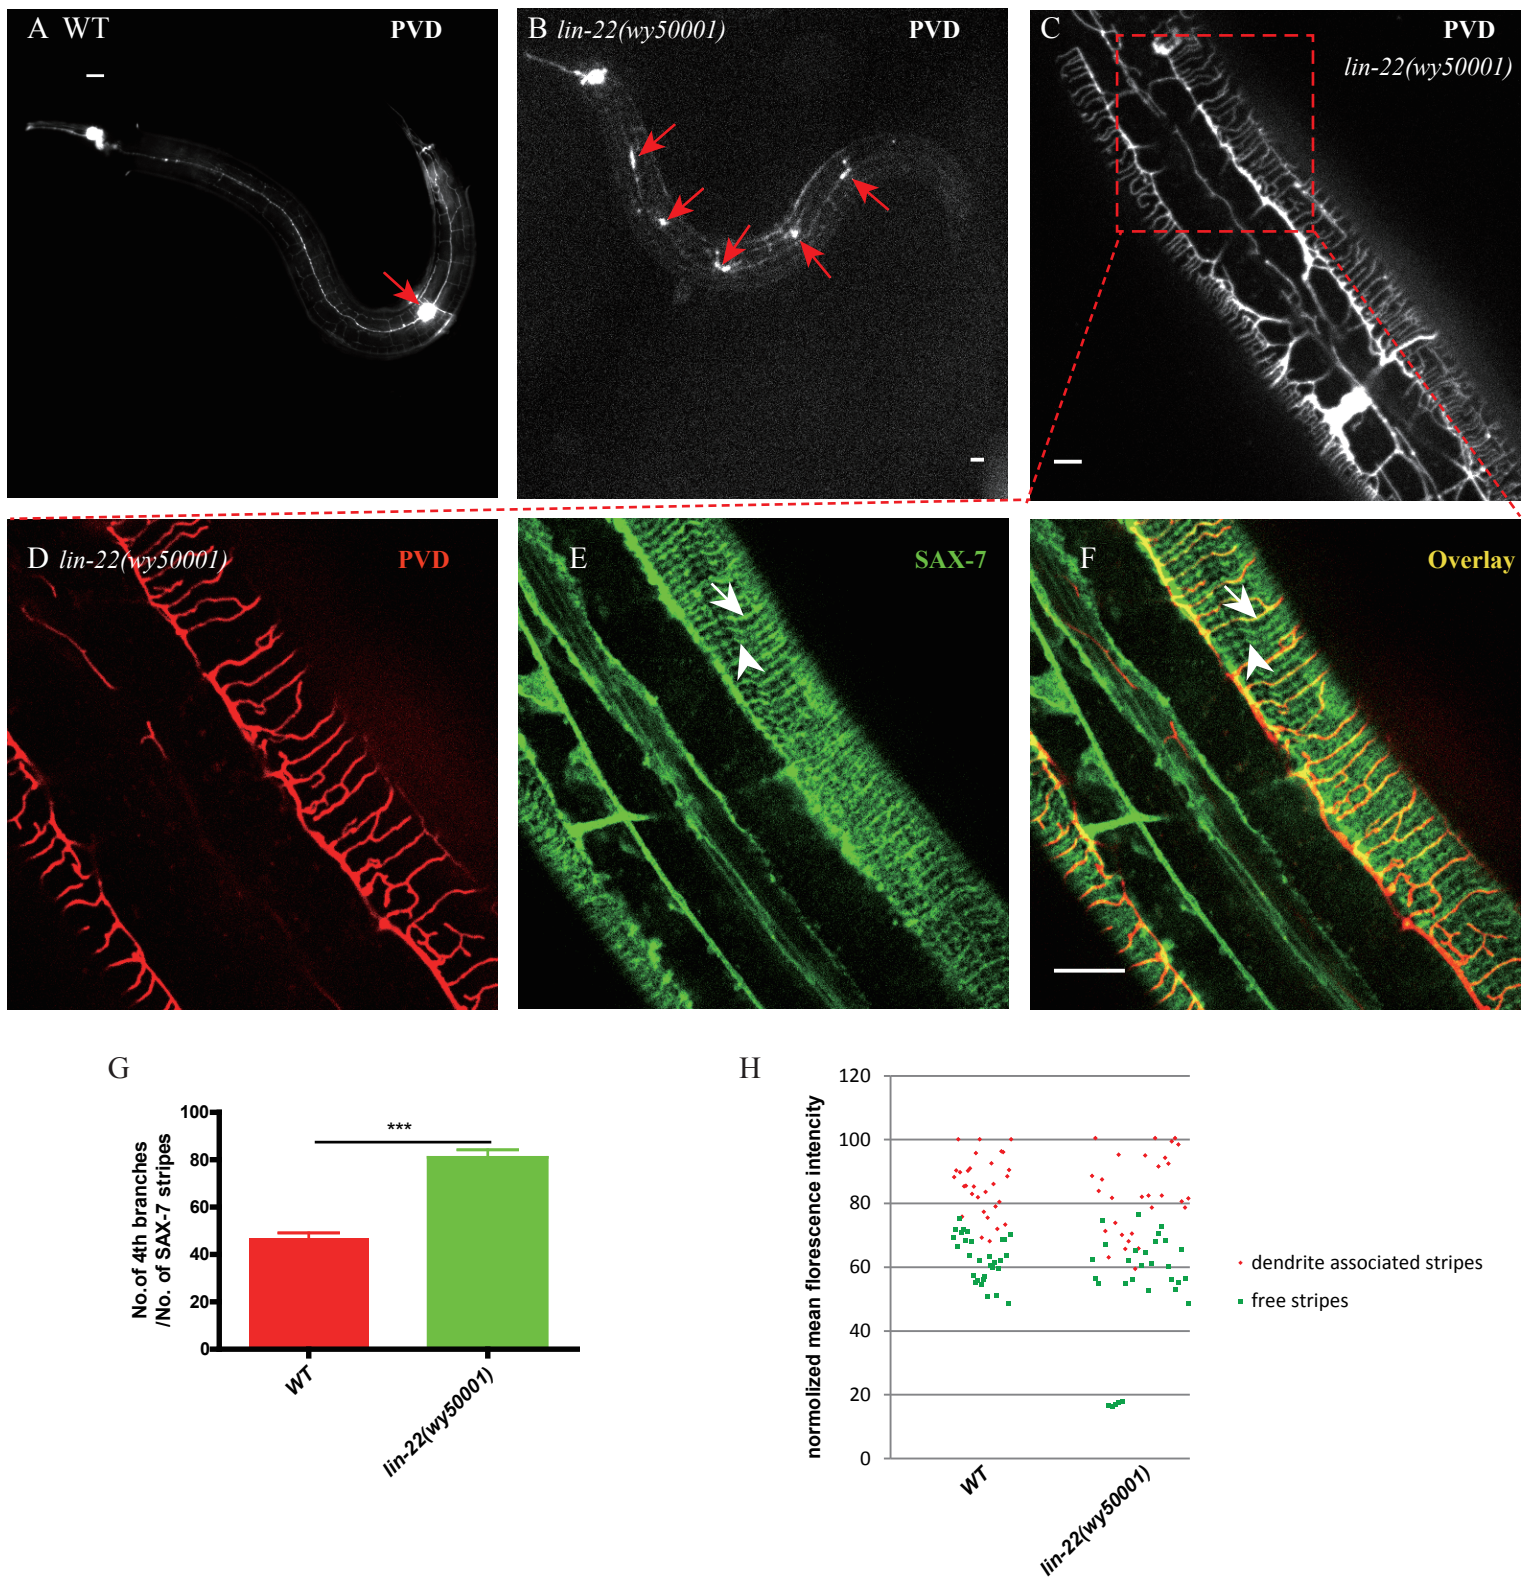

**Fig. S3**

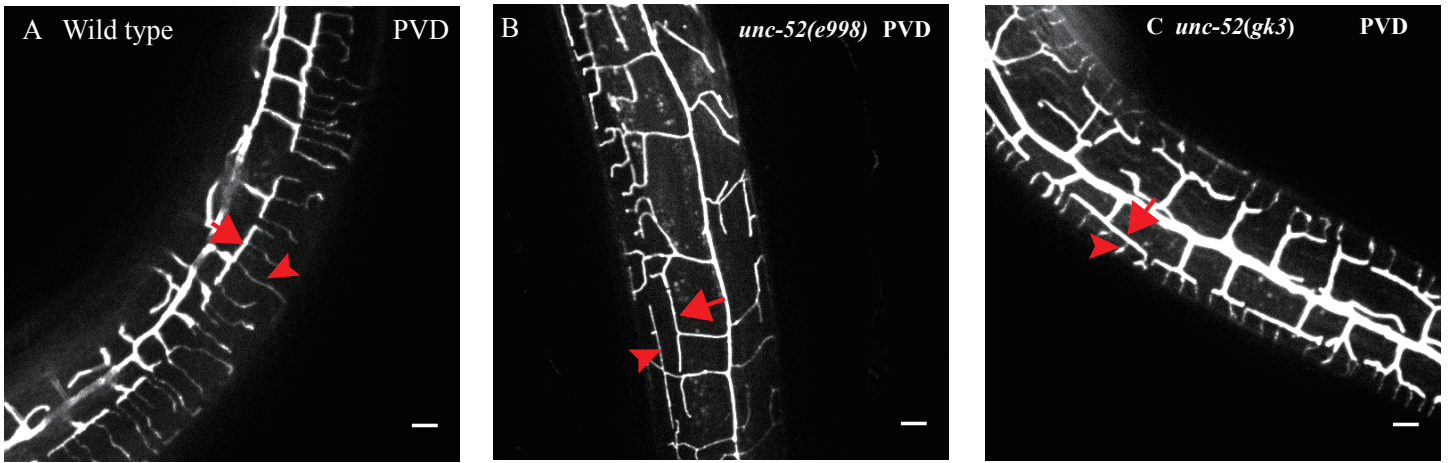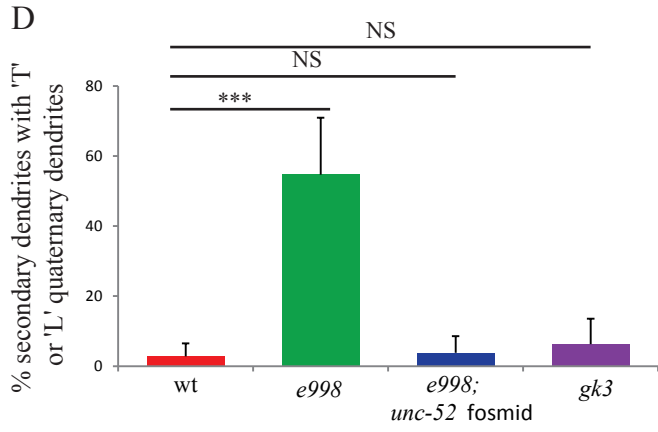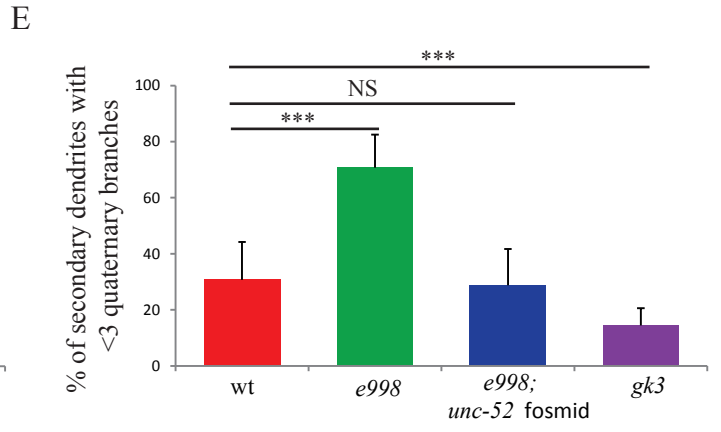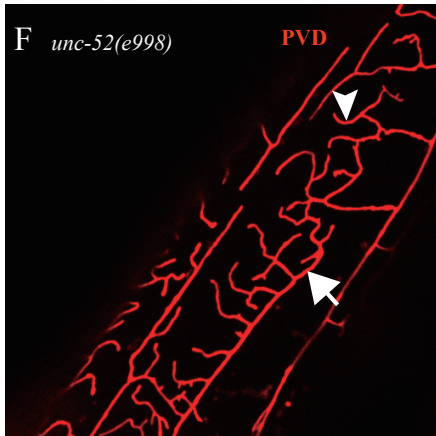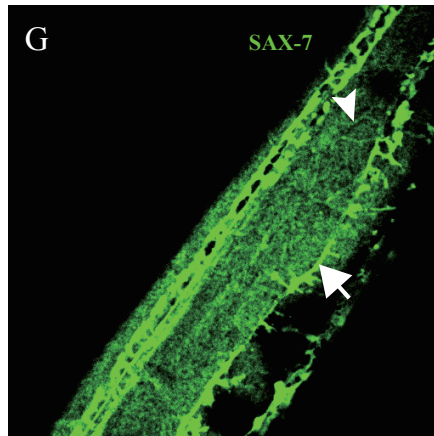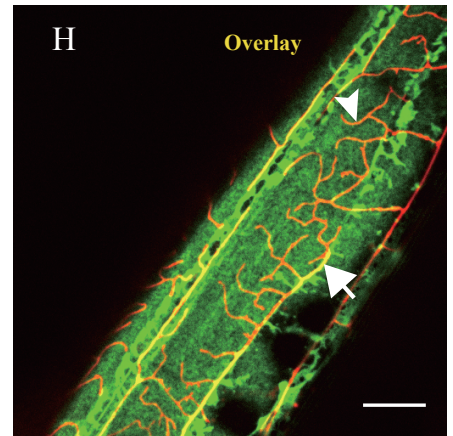



Fig. S4

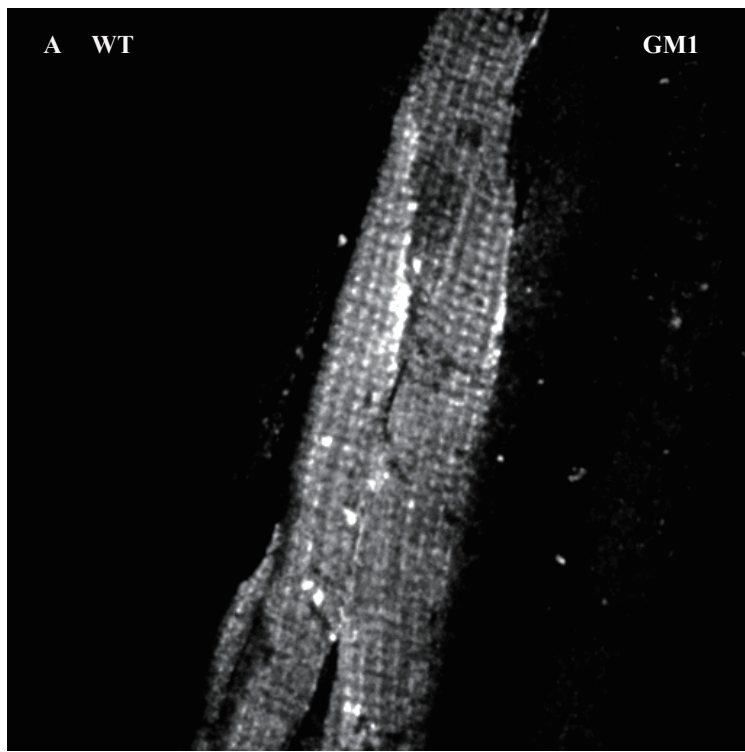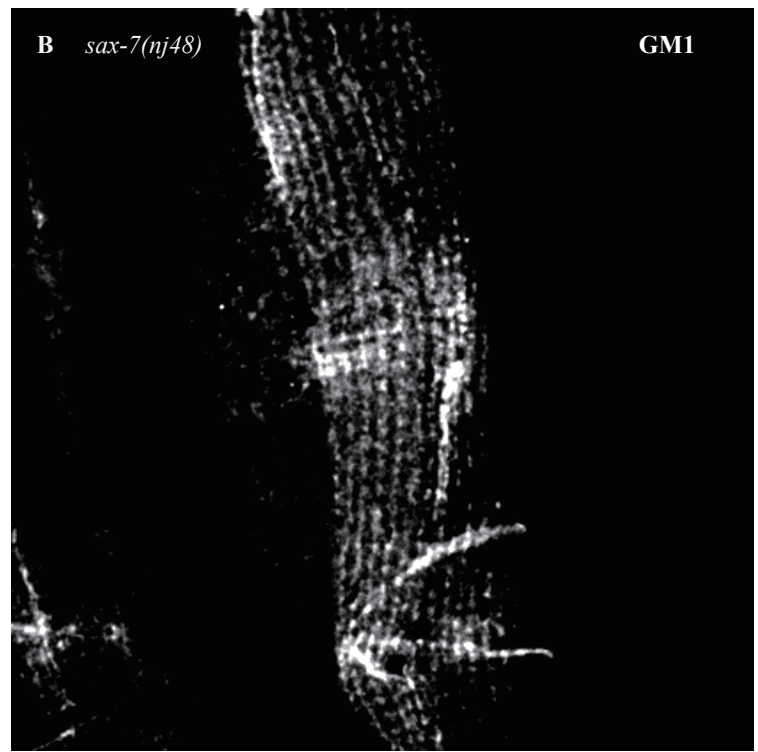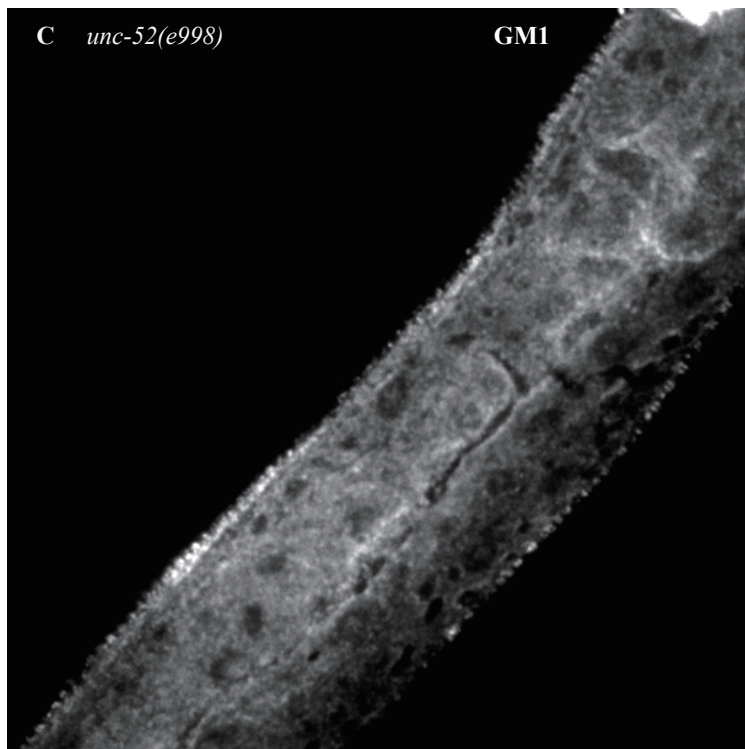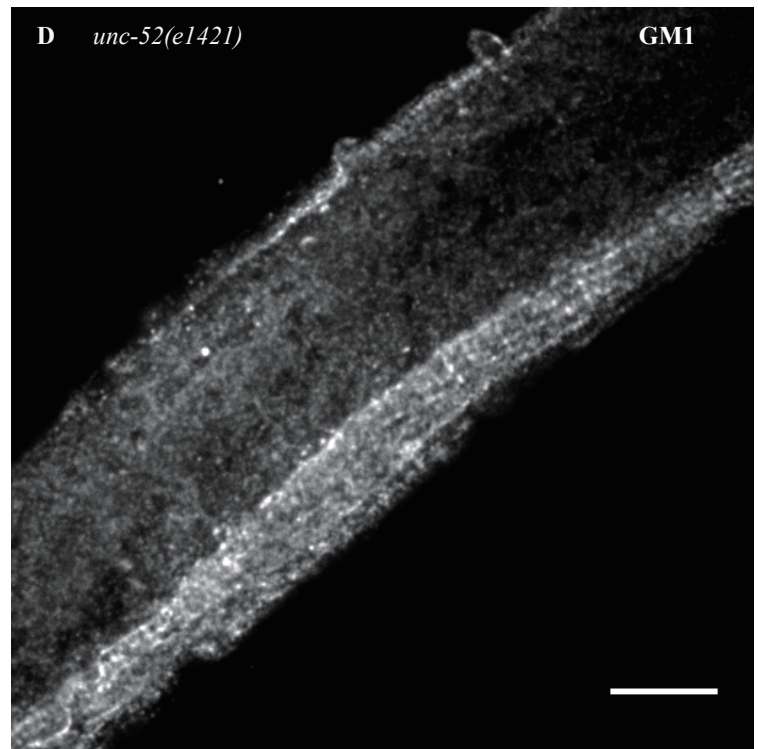



Fig. S5

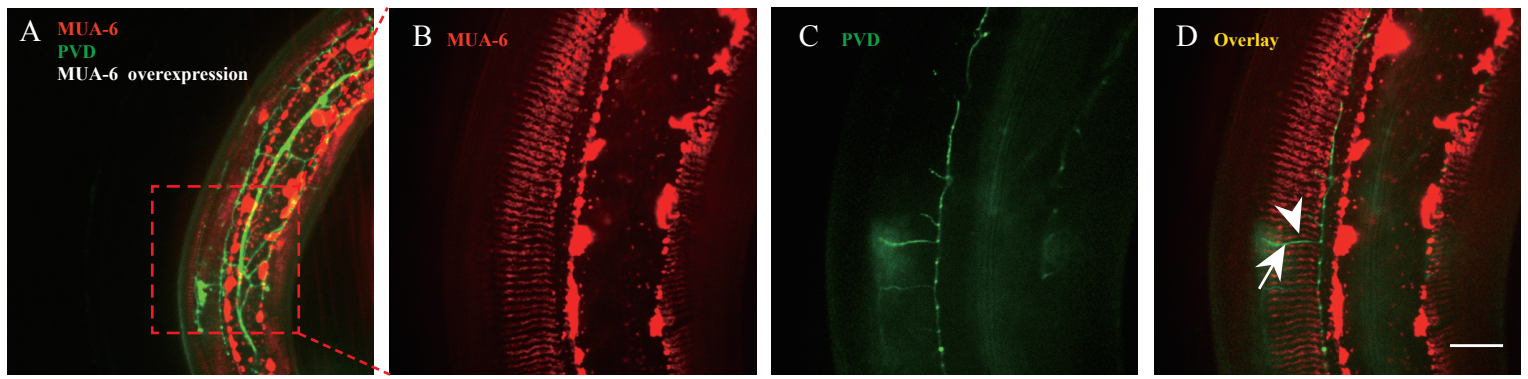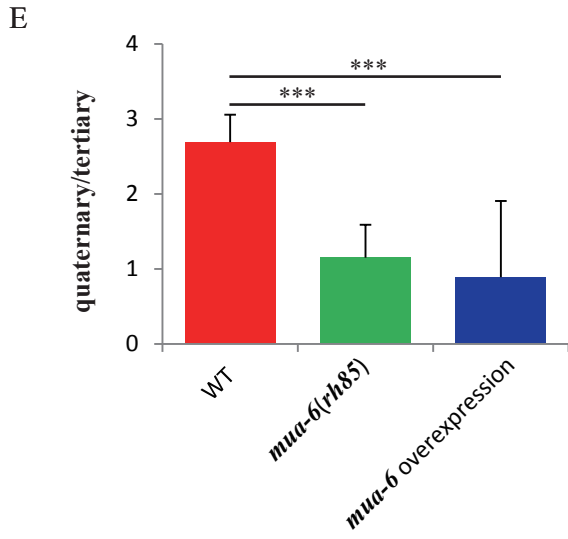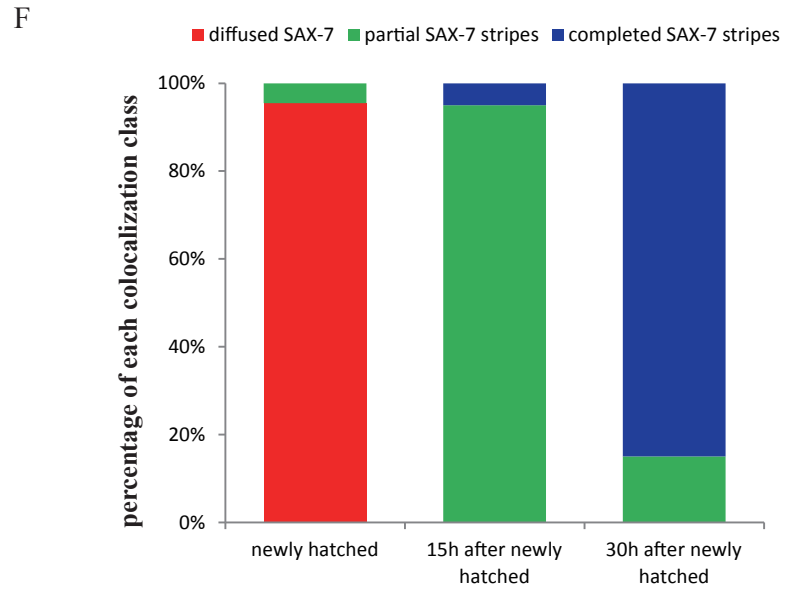

**Fig. S1, related to Fig. 1. Gain-of-function SAX-7 manipulations generate predictable patterns of 4° dendrites**

A-C) Confocal images of *sax-7(nj48)* mutant expressing PVD::mCherry and A/PLM::SAX-7::GFP. White arrowhead shows one PVD 3° branch, and yellow arrowhead indicates the PLM neurite. Yellow arrow marks the synaptic branch of PLM, and the white arrow shows a PVD branch that follows the synaptic branch of PLM. D-F) Confocal images of *sax-7(nj48); mnr-1(wy758)* double mutant expressing SAX-7 and MNR-1 (SAX-7's co-ligand) together in the D type neurons (DD and VD) and the A/PLM neurons. Yellow arrows indicate the commissures of D type neurons, and the white arrows show the PVD dendrites that follow the D type neurons' commissures. Yellow arrowheads indicate the ALM neurites, and the white arrowheads show the PVD 3° branch. G) Quantification of ratio between 4° and 3° branch of worms that SAX-7 ectopically expressed in A/PLM. H) Quantification of the ratio that 2° branches cross the sub-lateral line when *sax-7* ectopically expressed in D type neuron. Error bars, SEM. \*\*\*p < 0.001 by Student's t test. NS: not significant. n>20 for each genotype. I-K) Confocal images of *dma-1(wy686)* mutant expressing hypodermal SAX-7::YFP and PVD::mCherry. Arrow indicates the 3° branch and arrowhead shows one of the SAX-7 stripes. n=20. Scale bar is 10 μm.

**Fig. S2, related to Fig. 1. *lin-22* worms produce five PVDs and have denser 4° branches but still follow the SAX-7 stripes**

A-B) Confocal images of young adult wild type and *lin-22 (wy50001)* worm. The arrows indicate the cell bodies of PVDs. C-F) A *lin-22 (wy50001)* worm expressing both PVD::mCherry and *Pdpy-7::SAX-7::YFP*. Note that all the PVD 4° branches (red) co-localized with SAX-7 stripes



(green). Arrows indicate a SAX-7 stripe that is colocalized with a PVD branch. Arrowheads indicate a “free” SAX-7 stripe. G) Quantification of co-localization of PVD 4° branches and SAX-7 stripes. Y-axis means the average ratio of PVD 4° branches number/SAX-7 stripes number in one field around cell body. Error bars, SEM. \*\*\*p <0.001 by Student’s t test. n=20. H) Quantification of mean florescence intensity of SAX-7 stripes in dendrite associated stripes and “free” ones. Ten SAX-7 stripes in every worm were chosen randomly to measure the mean florescence intensity using ImageJ for this quantification. n=3. Error bars, SEM. \*\*\*p < 0.001 by Student’s t test. Scale bar is 10 µm.

**Fig. S3, related to Fig. 2. *unc-52(e998)* affects PVD dendrites and SAX-7 pattern, while *unc-52(gk3)* does not affect PVD dendrites development**

A-C) Florescent images of young adult wild type, *unc-52(e998)* and *unc-52(gk3)* expressing PVD::GFP. Arrow indicates one 3° branch and arrowhead shows one 4° branch. Scale bar is 10 µm. D) Quantification of the percentage of the 2° branches which contain “L” or “T” shaped 4° branches in *unc-52(e998)*, *unc-52(e998)* and the *unc-52* genomic DNA rescued worm, and *unc-52(gk3)* mutant. E) Quantification of percentage of the 2° branches which contain less than three 4° branches in *unc-52(e998)*, *unc-52(e998)* and the *unc-52* genomic DNA rescued worm, and *unc-52(gk3)* mutant. Error bars, SEM. \*\*\*p < 0.001 by ANOVA. NS: not significant. n>20 for each genotype. F-H) Confocal images of *unc-52(e998)*. In *unc-52(e998)* mutants the disorganized SAX-7 stripes were always followed by the disorganized PVD 4° branches. Arrows indicate the PVD tertiary branch and the SAX-7 sub-lateral tripe. Arrowheads mark one of the PVD quaternary branch and the co-localized SAX-7 stripe. Scale bar is 10 µm.

**Fig. S4, related to Fig. 3. UNC-52 antibody staining is affected in *unc-52* mutants but not *sax-7(nj48)***

A-D) GM1 antibody staining confocal images of young adult animals of wild type, *sax-7(nj48)*, *unc-52(e1421)* and *unc-52(e998)*. Compared with wild type, *sax-7(nj48)* did not change the regular pattern of UNC-52 (illustrated by GM1 staining). In *unc-52(e1421)* and *unc-52(e998)* the staining of UNC-52 was greatly reduced and the fluorescence becomes diffusely localized. n>10 for each genotype. Scale bar is 10  $\mu$ m.

**Fig. S5, related to Fig. 6. Overexpression MUA-6 blocked PVD 4° branches growth**

A-D) Confocal images of overexpressed MUA-6::mCherry and PVD::GFP. Arrow indicates one PVD 4° branch and arrowhead shows one FO stripe. E) Quantification of 4° branches in *mua-6(rh85)* and *mua-6* overexpression worms. Error bars, SEM. \*\*\*p < 0.001 by ANOVA. n>20. *mua-6(rh85)* mutant was very sick and also disrupted 2° and 3° branches, therefore, only identifiable 3° branches were quantified. F) Quantification of the SAX-7 stripes formation time. Diffused SAX-7 means no stripes were observed; partial SAX-7 stripes means SAX-7 stripes formed in some regions; completed SAX-7 stripes means SAX-7 stripes formed in all the regions. n=20 for each stage. Scale bar is 10  $\mu$ m.



**Table S1, related to experimental procedures “C. elegans Strains, Genetics and RNAi” section. Mutant Alleles and Transgenes Used in This Study**

**A. Mutant alleles**

| Allele                 | Reference                        |
|------------------------|----------------------------------|
| <i>unc-52(e998)</i>    | (Gregory P. Mullen et al., 1999) |
| <i>unc-52(e1421)</i>   | (Gregory P. Mullen et al., 1999) |
| <i>sax-7(nj48)</i>     | (Xintong Dong et al.,2013)       |
| <i>lin-22(wy50001)</i> | This study                       |
| <i>dma-1(wy686)</i>    | (Liu and Shen, 2012)             |
| <i>mua-6(rh85)</i>     | (Vera Hapiak et al.,2003)        |

**B. Integrated transgenes**

| Allele           | Chromosome | Constructs                     | Co-injection marker |
|------------------|------------|--------------------------------|---------------------|
| <i>wyIs50001</i> | X          | pXD26(15ng/ul),pOL036(5ng/ul)  | <i>Podr-1::RFP</i>  |
| <i>wyIs50005</i> | ?          | pOL036(20ng/ul),POL057(5ng/ul) | <i>Podr-1::RFP</i>  |

**C. Extrachromosomal arrays**

| Allele           | Constructs                         | Co-injection marker          |
|------------------|------------------------------------|------------------------------|
| <i>wyEx5147</i>  | pXD28(15ng/ul),pOL036(15ng/ul)     | <i>Podr-1::RFP</i>           |
| <i>wyEx5312</i>  | pXD30(15ng/ul),pOL036(15ng/ul)     | <i>Podr-1::RFP</i>           |
| <i>wyEx6519</i>  | pXD26(15ng/ul),pOL036(5ng/ul)      | <i>Podr-1::RFP</i>           |
| <i>wyEx6522</i>  | pXD26(0.1ng/ul),pOL036(5ng/ul)     | <i>Podr-1::RFP</i>           |
| <i>wyEx50017</i> | <i>unc-52</i> genomic DNA(25ng/ul) | <i>Pegl-17::myri-mCherry</i> |
| <i>wyEx50028</i> | pXM41(30ng/ul),pXM3(20ng/ul)       |                              |
| <i>wyEx50029</i> | pXM41(6ng/ul),pOL057(15ng/ul)      |                              |
| <i>wyEx50030</i> | pXM41(6ng/ul),pOL020(50ng/ul)      |                              |
| <i>wyEx50034</i> | pXM41(30ng/ul),pOL057(15ng/ul)     |                              |

**Table S2, related to experimental procedures “Molecular Biology and Transgenes” section. Plasmid Used in This Study**

| Plasmid | Genotype                            |
|---------|-------------------------------------|
| pOL020  | <i>ser-2Prom3::myr-GFP</i>          |
| pXD26   | <i>Pdpy-7::SAX-7S::YFP</i>          |
| pOL036  | <i>ser-2Prom3::myr-Cherry</i>       |
| pOL057  | <i>Pdpy-7::SAX-7S::GFP</i>          |
| pXD28   | <i>Pdpy-7::SAX-7S Del Ex::YFP</i>   |
| pXD30   | <i>Pdpy-7::SAX-7S Del Cyto::YFP</i> |
| pXM3    | <i>ser-2Prom3::GFP</i>              |
| pXM41   | <i>Pmua-6::MUA-6::Cherry</i>        |
